# Supplementary material for: Genetic factors affecting dopaminergic deterioration during the premotor stage of Parkinson disease
Source: PubMed Central journal article supplement (PMC8626486; doi:10.1038/s41531-021-00250-2), 2021-11-26
Supplement: 41531_2021_250_MOESM2_ESM.pdf [file 41531_2021_250_MOESM2_ESM.pdf]

**Supplementary Figure 1.**

**RCS fit and estimated trajectory using DAT SBRs of posterior putamen in GSH sPD patients.**

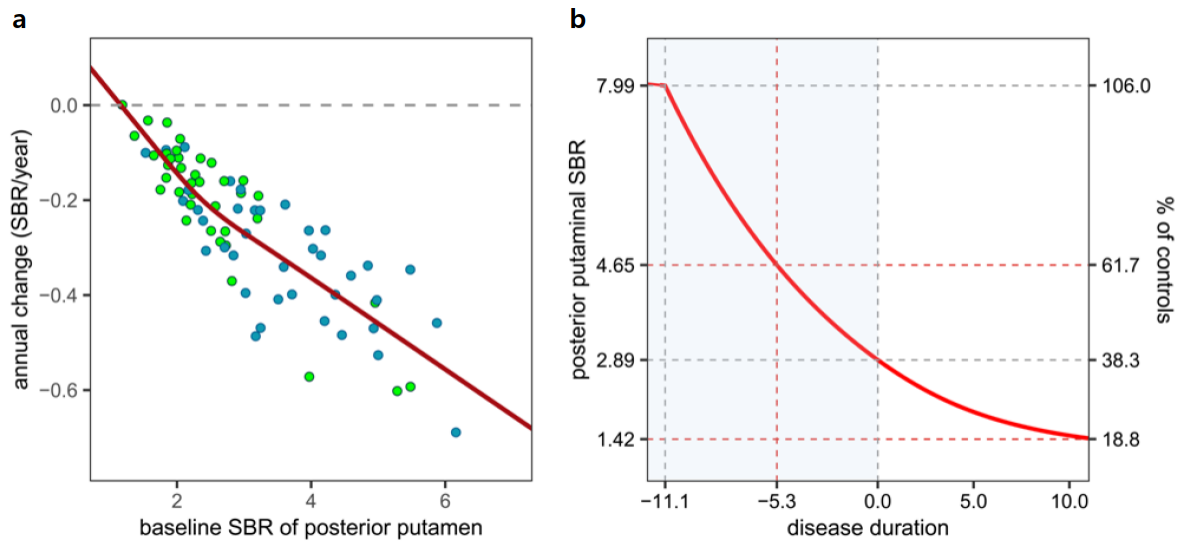

**Figure legend.** RCS curve fit between baseline SBR of posterior putamen and annual change rates (A) and estimated temporal trajectory of DAT SBR (B) in GSH cohort. DAT decline began 11.1 years prior to motor onset. Estimated DAT availability reached 60% of age-adjusted controls 5.3 years before the onset of motor features. 11.4 years later motor onset, estimated level decreased as 20% of age-adjusted controls.

### Supplementary Figure 2.

#### Comparison of DAT trajectories between GRS quantiles

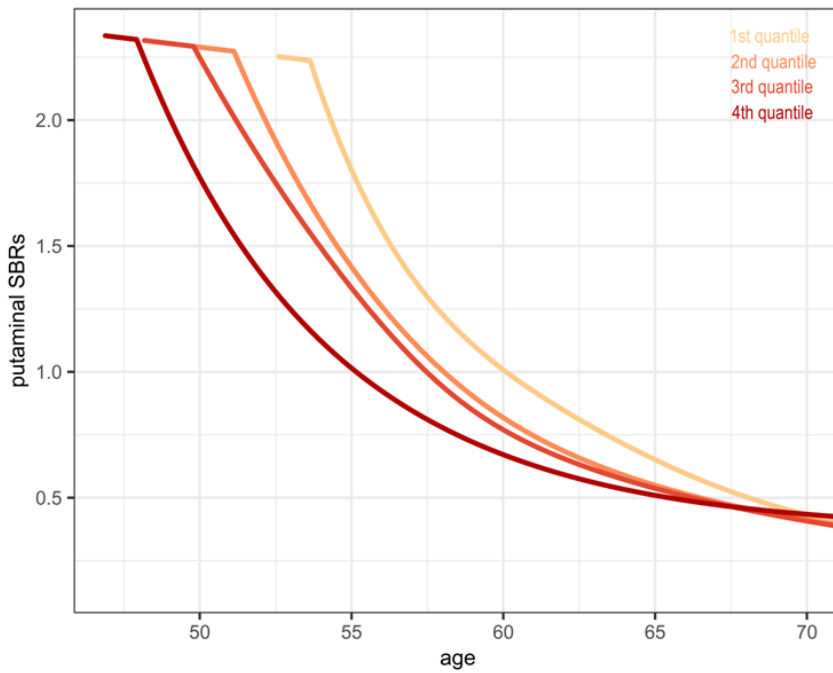

|                                                     | Quantile 1 | Quantile 2 | Quantile 3 | Quantile 4 |
|-----------------------------------------------------|------------|------------|------------|------------|
| Duration of premotor stage (years)                  | 9.4        | 9.8        | 10.3       | 11.8       |
| Age at motor onset                                  | 61.1       | 60.4       | 60.0       | 58.0       |
| Age at onset of DAT decline                         | 51.7       | 50.6       | 49.7       | 46.2       |
| SBR reduction rate during premotor stage (SBR/year) | 0.16       | 0.16       | 0.15       | 0.14       |
| SBR at onset of DAT decline                         | 2.24       | 2.27       | 2.29       | 2.32       |
| SBR at motor onset                                  | 0.78       | 0.75       | 0.76       | 0.68       |
| Number of PD patients                               | 83         | 83         | 83         | 83         |

**Figure legend.** Estimated DAT trajectories of GRS quantiles in sPD patients. Higher GRS quantile was associated with longer premotor stage and a trend of slower progression of dopaminergic dysfunction.

**Supplementary Figure 3.**

**Ethnic classification of PPMI subjects.**

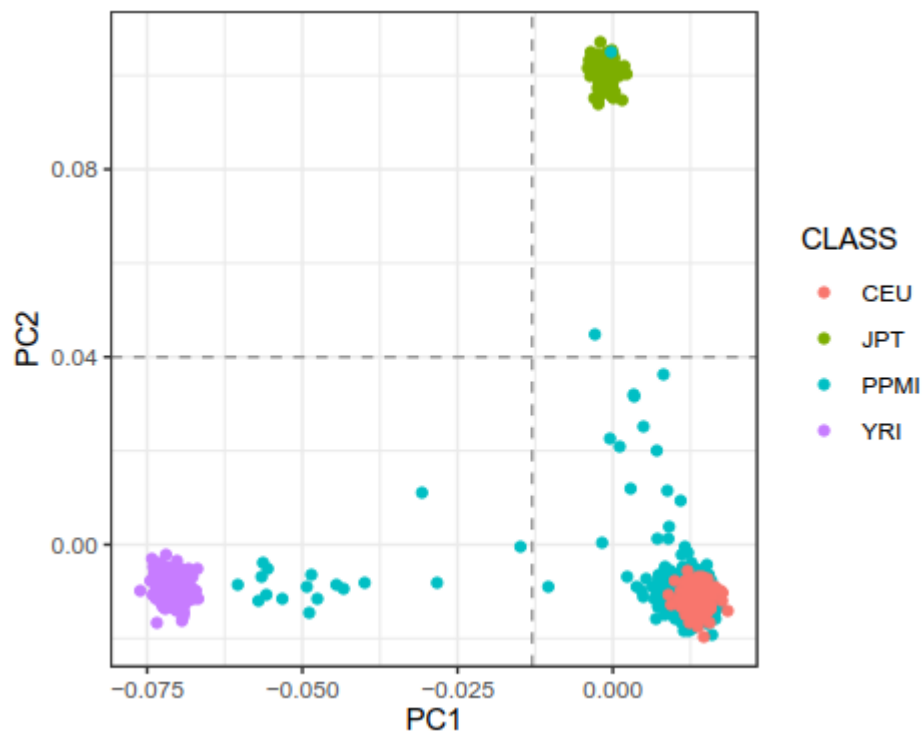

**Figure legend.** Scatter plot showing principal components (PCs) obtained from NEUROX chip data of PPMI and HAPMAP genetic data. CEU: 30 trios of northern and western European ancestry living in Utah from the Centre d'Etude du Polymorphisme Humain collection; JPT: 45 unrelated Japanese individuals in Tokyo, Japan; YRI: 30 mother-father-adult child trios from the Yoruba in Ibadan, Neigeria; PPMI: Parkinson's Progression Markers Initiative. Dashed line represents cut off value for European ancestry.

### Supplementary Figure 4.

#### Schematic explanation of the Euler method and its modification

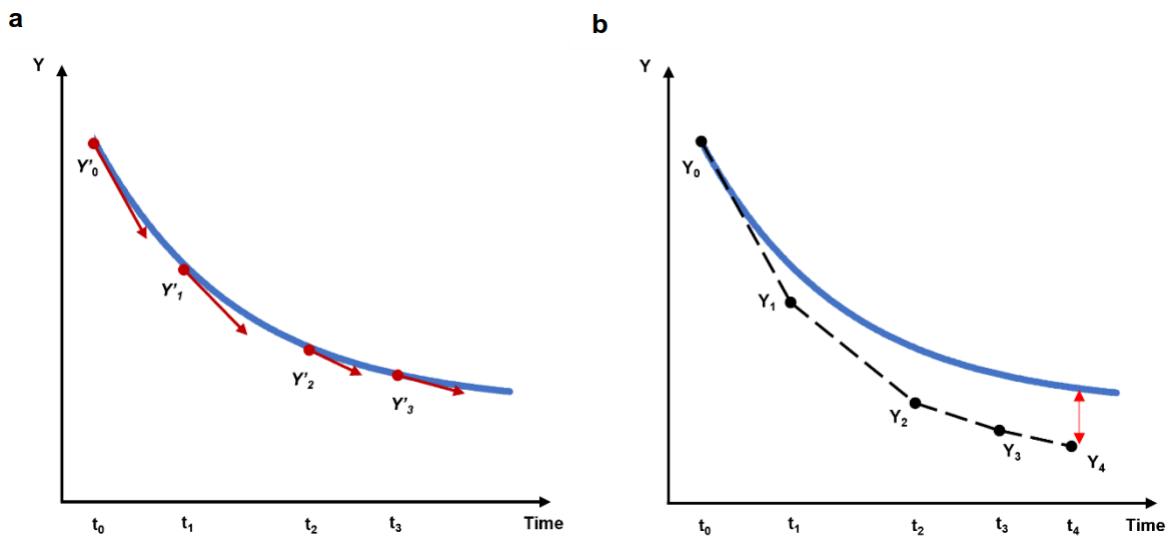

**Figure legends.** **a)** When function  $Y$  with unknown temporal pattern is given (blue line), the Euler method predicts a next coming value ( $Y_{n+1}$ ) using the slope (first derivative for time interval  $\Delta T$ ;  $Y'_n$ ) at previous value  $Y_n$  ( $Y_{n+1} = Y_n + Y'_n \times \Delta T$ ). **b)** In summary, the Euler method approximates total trajectory using consecutive tangent lines (dashed lines). Error between true values of function  $Y$  (blue line) and estimated value (dots) becomes greater when the time interval ( $\Delta T$ ) increases, thus modified Euler method uses the mean value of the first derivatives ( $Y'$ ) within interval. ( $Y_{n+1} = Y_n + [(Y'_n + Y'_{n+1})/2] \times \Delta T$ )

**Supplementary Figure 5.**

**Steps for obtaining an outcome of differential equation.**

**a**

| BL             | Linear fit                                                 |
|----------------|------------------------------------------------------------|
| B <sub>1</sub> | R <sub>1</sub> x disease duration + Intercept <sub>1</sub> |
| B <sub>2</sub> | R <sub>2</sub> x disease duration + Intercept <sub>2</sub> |
| B <sub>3</sub> | R <sub>3</sub> x disease duration + Intercept <sub>3</sub> |
| B <sub>4</sub> | R <sub>4</sub> x disease duration + Intercept <sub>4</sub> |
| .              | .                                                          |
| .              | .                                                          |

BL = baseline; R = slope of liner model

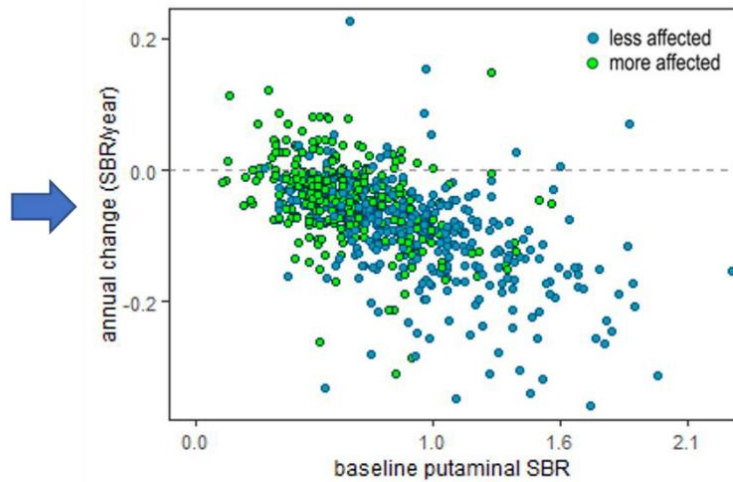

**b**

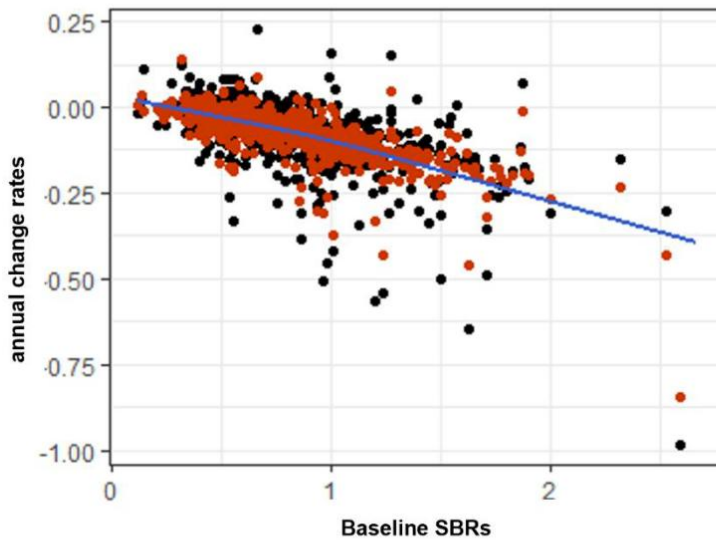

Red dot = Predicted value from LMM  
 Black dot = Actual SBRs and slopes  
 Blue line = restricted cubic spline fit for predicted values from LMM model

**Figure legend. a)** We calculated the annual change rates of each putaminal SBR, and plotted annual changes in SBRs against baseline values. Plotted values are represent baseline SBRs and change rates in sporadic PD group in the present study. **b)** Mixed effect model with cubic splines (knot location: 5-, 35-, 65- and 95-percentile of ebaseline SBRs) was applied, and predicted values were plotted. Then the curve showing association between baseline SBRs and predicted change rates was acquired by applying restricted cubic spline function.

### Supplementary Figure 6.

Steps for obtaining trajectory of DAT SBRs over time.

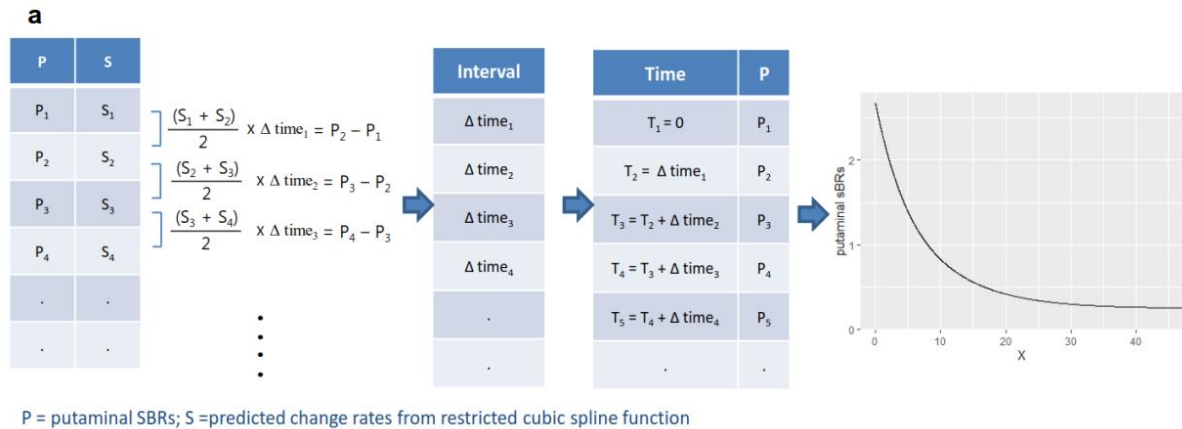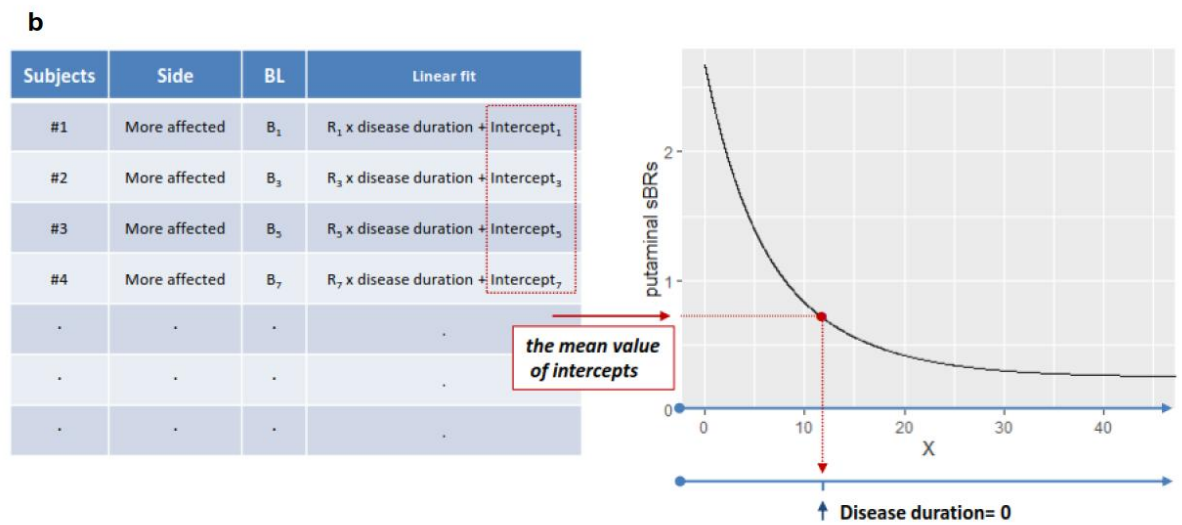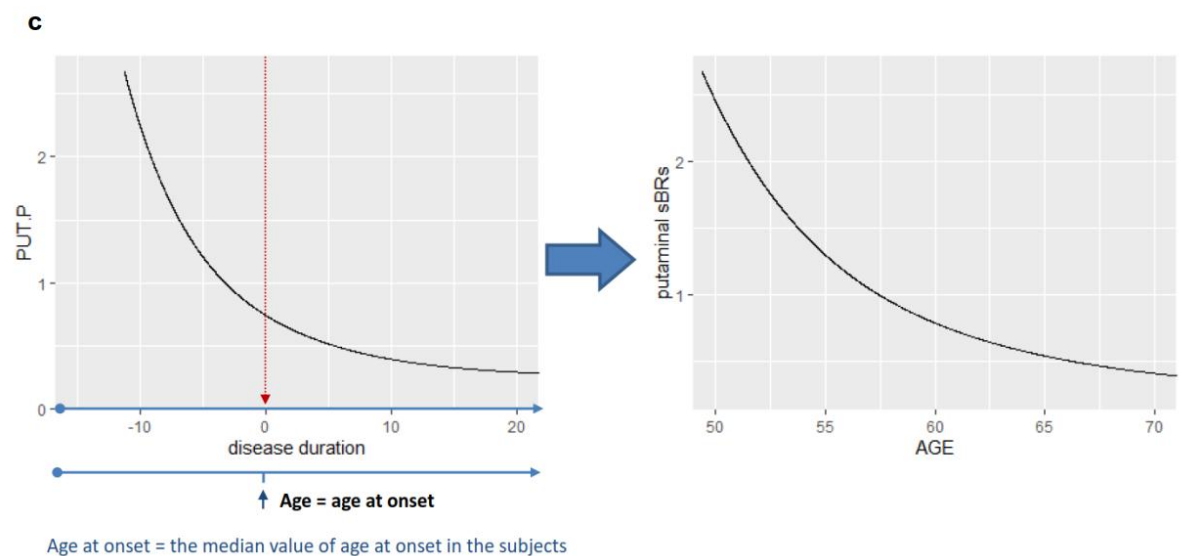

Figure legend. a) Estimating the shape of DAT SBRs over time. The modified Euler method

calculates a next-coming value and the shape of an unknown curve with given a differential equation when a unit time elapses. In the present study, the result of differential equation was obtained from restricted cubic spline fit (Supplementary Figure 3), so we can calculate a time elapsed as DAT SBRs decrease. **b)** Anchoring the trajectory along with disease duration. We applied disease duration = 0 (at the motor onset) for linear regression models of individual putamen at more affected side. The mean estimated putaminal SBR at the onset of motor symptoms was calculated to anchor the trajectory on the time point for the onset. **c)** Anchoring the trajectory along with age. To convert x-axis to age, "age" was calculated by adding the median value of age at onset (AAO) to disease duration (age = disease duration + the median AAO of each PD group).

### Supplementary Figure 7.

#### Combination of non-PD and PD state models

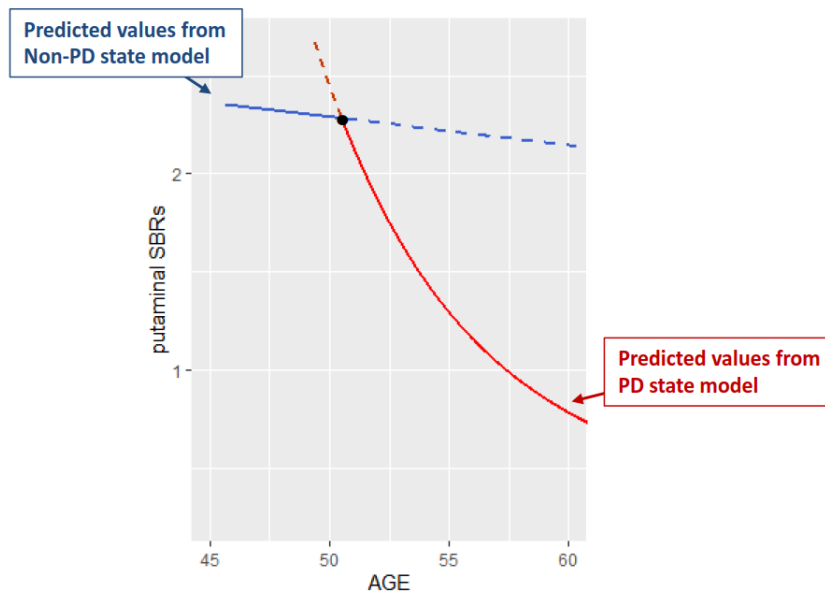

**Figure legend.** At the final step of estimating the DAT trajectory, we calculated the intersection point between non-PD and PD state models. The intersection point was defined as onset of striatal dopaminergic dysfunction.



**Supplementary Table 1.**

**Effect of genetic factors and age at onset (AAO) on the annual change rates of putaminal DAT SBRs**

| <b>Main effect</b>                    | <b>Reference group</b> | <b>Estimate</b> | <b>SE</b> | <b>t</b> | <b>p</b>              |
|---------------------------------------|------------------------|-----------------|-----------|----------|-----------------------|
| <b>AAO</b>                            |                        | -0.0012         | 0.0007    | -1.7176  | 0.087                 |
| <b>GRS (low GRS)</b>                  | high GRS               | -0.0148         | 0.0149    | -0.9944  | 0.321                 |
| <b>GBA PD vs. sPD (sPD)</b>           | <i>GBA</i> PD          | -0.0637         | 0.0205    | -3.1108  | 0.006 <sup>a*</sup>   |
| <b>GBA PD vs. LRRK2 PD (LRRK2 PD)</b> | <i>GBA</i> PD          | -0.0426         | 0.0261    | -1.6367  | 0.315 <sup>a</sup>    |
| <b>sPD vs. LRRK2 PD (sPD)</b>         | <i>LRRK2</i> PD        | -0.0279         | 0.0187    | -1.4968  | 0.405 <sup>a</sup>    |
| <b>Interaction with baseline SBRs</b> |                        |                 |           |          |                       |
| <b>AAO</b>                            |                        | 0.0015          | 0.0007    | 2.1378   | 0.033 <sup>*</sup>    |
| <b>GRS (low GRS)</b>                  | high GRS               | 0.0095          | 0.0157    | 0.6053   | 0.545                 |
| <b>GBA PD vs. sPD (sPD)</b>           | <i>GBA</i> PD          | 0.0917          | 0.0217    | 4.2272   | < 0.001 <sup>a*</sup> |
| <b>GBA PD vs. LRRK2 PD (LRRK2 PD)</b> | <i>GBA</i> PD          | 0.0652          | 0.0297    | 2.1950   | 0.090 <sup>a</sup>    |
| <b>sPD vs. LRRK2 PD (sPD)</b>         | <i>LRRK2</i> PD        | 0.0294          | 0.0217    | 1.3540   | 0.528 <sup>a</sup>    |

Results of linear mixed effect models covariated with AAO and disease duration; t= t-statistics in linear mixed effect model; GRS = genetic risk score; AAO = treated as continuous variable; a = corrected for multiple testing (Bonferroni correction); \* = p < 0.05.

**Supplementary Table 2.****Comparison of clinical and imaging characteristics between excluded and included PPMI PD subjects**

|                                     | <b>Excluded subset</b> | <b>Included subset</b> | <i>p</i> |
|-------------------------------------|------------------------|------------------------|----------|
| Age <sup>a</sup>                    | 64.0 ± 10.3            | 61.7 ± 9.6             | 0.014*   |
| Sex ratio (M:F) <sup>b</sup>        | 90:68                  | 306:195                | 0.357    |
| Disease duration <sup>c</sup>       | 4.1 ± 5.4              | 2.5 ± 2.5              | < 0.001* |
| MDS-UPDRS III, sum <sup>d</sup>     | 22.2 ± 10.8            | 20.7 ± 9.3             | 0.506    |
| H&Y stage <sup>b</sup>              | 59/80/8                | 208/263/8              | 0.060    |
| APOE e4 risk allele <sup>b</sup>    | 19/51 (37.2%)          | 91/350 (26.0%)         | 0.092    |
| Striatal DAT SBRs <sup>d</sup>      |                        |                        |          |
| Caudate nucleus, less affected side | 2.007 ± 0.722          | 2.103 ± 0.611          | 0.355    |
| Caudate nucleus, more affected side | 1.802 ± 0.662          | 1.826 ± 0.556          | 0.904    |
| Putamen, less affected side         | 0.965 ± 0.481          | 0.968 ± 0.388          | 0.610    |
| Putamen, more affected side         | 0.719 ± 0.425          | 0.671 ± 0.288          | 0.059    |

Mean ± SD; DAT = dopamine transporter; SBR = specific binding ratio; a= independent t-test; b = chi-square test; c = Mann-Whitney U test; d = linear regression covariates age, sex and disease duration; \* = *p*-value < 0.05

**Supplementary Table 3. List of SNPs for the calculation of genetic risk scores (GRSs)**

| SNP         | Location (hg19) | Nearest gene      | Alleles* | MAF   | Meta-OR |
|-------------|-----------------|-------------------|----------|-------|---------|
| rs10797576  | chr1:232664611  | SIPA1L2           | T>C (T)  | 0.092 | 1.13    |
| rs10906923  | chr10:15569598  | ITGA8             | C>A (C)  | 0.300 | 0.93    |
| rs11060180  | chr12:123303586 | CCDC62            | G>A (G)  | 0.483 | 0.91    |
| rs11158026  | chr14:55348869  | GCH1              | T>C (T)  | 0.367 | 0.91    |
| rs11343     | chr16:19279464  | SYT17             | T>G (T)  | 0.475 | 1.08    |
| rs114138760 | chr1:154898185  | PMVK              | C>G (C)  | 0.017 | 1.50    |
| rs115185635 | chr3:87520857   | intergenic        | C>G (C)  | 0.050 | 1.79    |
| rs11724635  | chr4:15737101   | BST1              | C>A (C)  | 0.433 | 0.89    |
| rs117896735 | chr10:121536327 | INPP5F            | A>G (A)  | 0.017 | 1.77    |
| rs118117788 | chr10:121710488 | MIR4682 [-7537bp] | T>C (T)  | 0.025 | 1.58    |
| rs11868035  | chr17:17715101  | SREBF1            | A>G (A)  | 0.258 | 0.94    |
| rs12456492  | chr18:40673380  | RIT2              | G>A (G)  | 0.375 | 1.10    |
| rs12497850  | chr3:48748989   | IP6K2             | G>T (G)  | 0.392 | 0.93    |
| rs12637471  | chr3:182762437  | MCCC1             | A>G (A)  | 0.242 | 0.84    |
| rs1293298   | chr8:11712443   | CTSB              | C>A (C)  | 0.233 | 0.92    |
| rs13294100  | chr9:17579690   | SH3GL2            | T>G (T)  | 0.350 | 0.91    |
| rs14235     | chr16:31121793  | BCKDK             | A>G (A)  | 0.450 | 1.10    |
| rs17649553  | chr17:43994648  | MAPT              | T>C (T)  | 0.217 | 0.77    |
| rs1955337   | chr2:169129145  | STK39 [+24494bp]  | T>G (T)  | 0.083 | 1.21    |
| rs199347    | chr7:23293746   | GPNMB             | G>A (G)  | 0.392 | 0.90    |
| rs2280104   | chr8:22525980   | BIN3              | T>C (T)  | 0.358 | 1.08    |
| rs2414739   | chr15:61994134  | intergenic        | G>A (G)  | 0.283 | 0.90    |
| rs2694528   | chr5:60273923   | NDUFAF2           | C>A (C)  | 0.117 | 1.14    |
| rs329648    | chr11:133765367 | MIR4697 [-3032bp] | T>C (T)  | 0.333 | 1.11    |
| rs34043159  | chr2:102413116  | MAP4K4            | C>T (C)  | 0.383 | 1.08    |
| rs34311866  | chr4:951947     | TMEM175           | C>T (C)  | 0.150 | 1.26    |
| rs34884217  | chr4:944210     | TMEM175           | C>A (C)  | 0.100 | 0.74    |
| rs353116    | chr2:166133632  | SCN2A             | T>C (T)  | 0.358 | 0.93    |
| rs356181    | chr4:90626139   | SNCA [-19111bp]   | A>G (A)  | 0.467 | 0.78    |
| rs356182    | chr4:90626111   | SNCA [-19139bp]   | G>A (G)  | 0.417 | 1.34    |
| rs3793947   | chr11:83544472  | DLG2              | A>G (A)  | 0.375 | 0.91    |
| rs3910105   | chr4:90682571   | SNCA              | G>A (G)  | 0.458 | 0.89    |
| rs4073221   | chr3:18277488   | TBC1D5            | G>T (G)  | 0.133 | 1.11    |
| rs4653767   | chr1:226916078  | ITPKB             | C>T (C)  | 0.283 | 0.92    |
| rs4784227   | chr16:52599188  | TOX3 [+17474bp]   | T>C (T)  | 0.208 | 1.09    |
| rs55785911  | chr20:3153503   | UBOX5 [+12661bp]  | A>G (A)  | 0.417 | 0.91    |
| rs591323    | chr8:16697091   | intergenic        | A>G (A)  | 0.325 | 0.91    |
| rs6430538   | chr2:135539967  | intergenic        | T>C (T)  | 0.408 | 0.88    |
| rs6812193   | chr4:77198986   | FAM47E            | T>C (T)  | 0.392 | 0.91    |
| rs71628662  | chr1:155359992  | ASH1L             | T>C (T)  | 0.018 | 0.52    |
| rs76904798  | chr12:40614434  | LRRK2             | T>C (T)  | 0.158 | 1.16    |
| rs78738012  | chr4:114360372  | CAMK2D [-11816bp] | C>T (C)  | 0.150 | 1.14    |
| rs8005172   | chr14:88472612  | GPR65             | T>C (T)  | 0.400 | 1.07    |
| rs823118    | chr1:205723572  | NUCKS1 [+4168bp]  | C>T (C)  | 0.450 | 0.89    |
| rs9468199   | chr6:27681215   | intergenic        | A>G (A)  | 0.108 | 1.10    |

Alleles = effect allele &gt; alternative allele (minor allele), MAF = minor allele frequencies in 1000G

database (Caucasian), meta-OR = meta-odds ratio of PD in the public database (pdgene.org)
